# Supplementary material
Source: PubMed Central journal article supplement (PMC8091851)
Supplement: JCM.00083-21-s0001.pdf [file JCM.00083-21-s0001.pdf]

## Supplementary Materials

### Supplementary Methods

#### Anterior Nasal Swab Collection procedure

The following swab collection procedure was utilized: after the participant blew their nose, the collector inserted swab #1 into the individual's right nostril and rotated the swab 5 times in a circular motion around the inside wall of the nostril for a duration of 10-15 seconds, followed by a repeat of the process in the left nostril. The swab was placed into a sterile plastic tube.

Immediately thereafter, swab #2 was inserted into the individual's left nostril (always opposite from the initial swab) and the process repeated (left nostril followed by right nostril). To minimize sampling bias, the study site personnel alternated which test-specific nasal swab sample was collected first (BinaxNOW or RT-PCR).

#### Kit Storage

Abbott BinaxNOW kits were stored in a temperature-controlled office (70-72°F) and transferred to the testing site as needed.

#### Testing Site

Testing was performed in a "testing pod," initially a shipping container. The pod was initially open on one side to the outdoors, but difficulty in maintaining adequate temperature in the pod required moving testing to a fully enclosed room (mobile trailer). The testing site contained three 6' tables. Two tables were designated as "dirty" for testing purposes and one "clean" for data entry. Absorbent underpads with plastic backing (Attends ASB-2336, Greenville, NC) were placed on testing tables along with hand sanitizer, gloves, testing kits, pens, sticky notes, a

continuous temperature and humidity data logger (HOBO UX100-011A, Bourne, MA), a digital clock, and a bin for specimens to be tested. The clean table included hand sanitizer, gloves, pens, a time stamp machine, and a laptop computer for data entry. Underpads were removed daily, surfaces were disinfected with germicidal disposable wipes (PDI, Woodcliff Lake, NJ), and new underpads placed. Operators performing testing were wearing disposable gowns, N95 respirators, face shields and gloves.

### Quality Control

Lot numbers were recorded for Abbott BinaxNOW kits (boxes of 40 tests), test cards, manufacturer-provided swabs [unflocked foam tipped; Puritan #25-1506 (Guilford, ME)], positive controls, and extraction reagent. Manufacture and expiration dates were also recorded. Each study subject tested was recorded for every kit of BinaxNow tests used. Positive and negative controls were run for every kit when first opened. If an opened kit was not used in full over the course of one day, a negative control was run for the kit the following day when testing resumed.

### BinaxNOW Testing

At the collection site, anterior nasal swab specimens were collected using the manufacturer-provided swab (above) into a labeled 15ml conical tube and placed into a specimen collection bag with a BinaxNow intake form (which was labeled and time/date stamped at the time of collection) and extra labels. Specimens were then shuttled to the testing pod by a designated individual (“runner”), either on foot (shipping container) or by car (mobile trailer). All tests were initiated within an hour of specimen collection time. For each specimen, testing staff added 6 drops of extraction reagent to the BinaxNOW card (making sure to remain perpendicular and

avoid touching the tip of the reagent bottle to the card), inserted the swab specimen and rotated three times, closed the testing card, and affixed a patient label to the outside of the BinaxNOW card. The time the card was closed was recorded on the BinaxNOW intake form as the test start time. The test start time and time the card was to be read (16 minutes after closing the card) were also recorded on a sticky note and adhered to the outside of the BinaxNOW card. At the time of result reading, the tester silently recorded their result, initials, and time on the Binax intake form as the official result. The tester then passed the card to a second reader, who read the card result aloud (so that the tester could record results on the back of the intake form) and took a photo of the card. There was no attempt to resolve any discordance between the two readers; the first read of each card was the official result used for database and clinical reporting. If the result was determined to be positive by either reader, the reader categorized the positive line as “faint”, “medium”, or “strong” depending on the strength of the positive sample line compared to the control line of each card. Completed BinaxNOW cards were discarded in biohazard waste.

### PCR assay details

Dry swabs [SteriPack Sterile Polyester Spun Swab, 3” (Lakeland, Florida)]

transported in a sterile tube (Becton Dickinson, # BD 366408) at room temperature were resuspended in 1000 uL of Swab Preservation Buffer (Norgen Biotek, Inc) and allowed to elute for 15 minutes. Extraction and RT-PCR methods followed the EUA protocol for the CRSP SARS-CoV-2 Real-time Reverse Transcriptase (RT)-PCR Diagnostic Assay

(<https://www.fda.gov/media/139858/download>); the target is the N2 gene with a cycle threshold cut off value of 40. A standard curve was prepared with FDA reference panel material [heat inactivated virus from BEI Resources ([www.beiresources.org](http://www.beiresources.org))] using serial dilutions (in

triplicate) made in negative clinical matrix then spiked onto dry swabs, allowed to dry, and subsequently taken all the way through the process.

**Supplementary Table 1**  
**Abbott BinaxNow results, RT-PCR Ct values, and symptoms in RT-PCR-positive adults**

| Age | Sex | PCR Result | Ct (N2) | Ct (RP) | Binax Result | COVID-19 symptoms? | Sore throat? | Cough? | Chills? | Body Aches? | Short of Breath? | Fever? | Runny Nose? | Congestion? | Nausea? | Vomiting? | Diarrhea? | Loss of Taste or Smell? | # Days Since Symptom Onset |
|-----|-----|------------|---------|---------|--------------|--------------------|--------------|--------|---------|-------------|------------------|--------|-------------|-------------|---------|-----------|-----------|-------------------------|----------------------------|
| 21  | F   | POS        | 34.26   | 19.58   | NEG          | ASK                |              |        |         |             |                  |        |             |             |         |           |           |                         | n/a                        |
| 23  | M   | POS        | 35.48   | 25.16   | NEG          | ASK                |              |        |         |             |                  |        |             |             |         |           |           |                         | n/a                        |
| 26  | M   | POS        | 35.43   | 25.88   | NEG          | ASK                |              |        |         |             |                  |        |             |             |         |           |           |                         | n/a                        |
| 27  | M   | POS        | 35.17   | 24.26   | NEG          | ASK                |              |        |         |             |                  |        |             |             |         |           |           |                         | n/a                        |
| 28  | F   | POS        | 34.66   | 26.29   | NEG          | ASK                |              |        |         |             |                  |        |             |             |         |           |           |                         | n/a                        |
| 30  | M   | POS        | 35.19   | 20.77   | NEG          | ASK                |              |        |         |             |                  |        |             |             |         |           |           |                         | n/a                        |
| 33  | M   | POS        | 32.76   | 24.52   | NEG          | ASK                |              |        |         |             |                  |        |             |             |         |           |           |                         | n/a                        |
| 34  | M   | POS        | 32.36   | 22.42   | NEG          | ASK                |              |        |         |             |                  |        |             |             |         |           |           |                         | n/a                        |
| 38  | F   | POS        | 31.22   | 21.78   | NEG          | ASK                |              |        |         |             |                  |        |             |             |         |           |           |                         | n/a                        |
| 39  | M   | POS        | 37.03   | 28.61   | NEG          | ASK                |              |        |         |             |                  |        |             |             |         |           |           |                         | n/a                        |
| 48  | M   | POS        | 35.29   | 27.46   | NEG          | ASK                |              |        |         |             |                  |        |             |             |         |           |           |                         | n/a                        |
| 50  | F   | POS        | 34.87   | 21.31   | NEG          | ASK                |              |        |         |             |                  |        |             |             |         |           |           |                         | n/a                        |
| 50  | F   | POS        | 34.73   | 24.63   | NEG          | ASK                |              |        |         |             |                  |        |             |             |         |           |           |                         | n/a                        |
| 56  | F   | POS        | 32.3    | 26.75   | NEG          | ASK                |              |        |         |             |                  |        |             |             |         |           |           |                         | n/a                        |
| 60  | F   | POS        | 31.6    | 26.5    | NEG          | ASK                |              |        |         |             |                  |        |             |             |         |           |           |                         | n/a                        |
| 71  | M   | POS        | 33.2    | 19.62   | NEG          | ASK                |              |        |         |             |                  |        |             |             |         |           |           |                         | n/a                        |
| 91  | M   | POS        | 34.56   | 24.54   | NEG          | ASK                |              |        |         |             |                  |        |             |             |         |           |           |                         | n/a                        |
| 21  | M   | POS        | 14.62   | 23.23   | POS          | ASK                |              |        |         |             |                  |        |             |             |         |           |           |                         | n/a                        |
| 22  | F   | POS        | 32.89   | 30.74   | POS          | ASK                |              |        |         |             |                  |        |             |             |         |           |           |                         | n/a                        |
| 22  | M   | POS        | 27.74   | 22.13   | POS          | ASK                |              |        |         |             |                  |        |             |             |         |           |           |                         | n/a                        |
| 23  | F   | POS        | 18.75   | 25.23   | POS          | ASK                |              |        |         |             |                  |        |             |             |         |           |           |                         | n/a                        |
| 23  | F   | POS        | 26.75   | 24.18   | POS          | ASK                |              |        |         |             |                  |        |             |             |         |           |           |                         | n/a                        |
| 24  | M   | POS        | 29.67   | 21.5    | POS          | ASK                |              |        |         |             |                  |        |             |             |         |           |           |                         | n/a                        |
| 25  | M   | POS        | 14.1    | 19.83   | POS          | ASK                |              |        |         |             |                  |        |             |             |         |           |           |                         | n/a                        |
| 27  | F   | POS        | 20.69   | 27.21   | POS          | ASK                |              |        |         |             |                  |        |             |             |         |           |           |                         | n/a                        |
| 28  | M   | POS        | 23.63   | 27.99   | POS          | ASK                |              |        |         |             |                  |        |             |             |         |           |           |                         | n/a                        |
| 29  | F   | POS        | 22.21   | 24.08   | POS          | ASK                |              |        |         |             |                  |        |             |             |         |           |           |                         | n/a                        |
| 31  | F   | POS        | 17.55   | 27.16   | POS          | ASK                |              |        |         |             |                  |        |             |             |         |           |           |                         | n/a                        |
| 31  | M   | POS        | 14.57   | 22.16   | POS          | ASK                |              |        |         |             |                  |        |             |             |         |           |           |                         | n/a                        |
| 32  | M   | POS        | 28.17   | 24.67   | POS          | ASK                |              |        |         |             |                  |        |             |             |         |           |           |                         | n/a                        |
| 34  | F   | POS        | 22.47   | 27.53   | POS          | ASK                |              |        |         |             |                  |        |             |             |         |           |           |                         | n/a                        |
| 35  | F   | POS        | 17.39   | 23.93   | POS          | ASK                |              |        |         |             |                  |        |             |             |         |           |           |                         | n/a                        |
| 38  | M   | POS        | 26.95   | 24.65   | POS          | ASK                |              |        |         |             |                  |        |             |             |         |           |           |                         | n/a                        |
| 39  | F   | POS        | 20.82   | 29.82   | POS          | ASK                |              |        |         |             |                  |        |             |             |         |           |           |                         | n/a                        |
| 42  | F   | POS        | 13.65   | 22.24   | POS          | ASK                |              |        |         |             |                  |        |             |             |         |           |           |                         | n/a                        |
| 42  | F   | POS        | 28.4    | 25.58   | POS          | ASK                |              |        |         |             |                  |        |             |             |         |           |           |                         | n/a                        |
| 46  | M   | POS        | 12.82   | 20.87   | POS          | ASK                |              |        |         |             |                  |        |             |             |         |           |           |                         | n/a                        |
| 48  | F   | POS        | 16.4    | 24.47   | POS          | ASK                |              |        |         |             |                  |        |             |             |         |           |           |                         | n/a                        |
| 49  | F   | POS        | 22.3    | 23.42   | POS          | ASK                |              |        |         |             |                  |        |             |             |         |           |           |                         | n/a                        |
| 50  | M   | POS        | 16.35   | 24.14   | POS          | ASK                |              |        |         |             |                  |        |             |             |         |           |           |                         | n/a                        |
| 51  | M   | POS        | 26.91   | 23.37   | POS          | ASK                |              |        |         |             |                  |        |             |             |         |           |           |                         | n/a                        |
| 51  | M   | POS        | 17.16   | 23.86   | POS          | ASK                |              |        |         |             |                  |        |             |             |         |           |           |                         | n/a                        |
| 53  | F   | POS        | 25.78   | 23.3    | POS          | ASK                |              |        |         |             |                  |        |             |             |         |           |           |                         | n/a                        |
| 53  | F   | POS        | 21.4    | 23.19   | POS          | ASK                |              |        |         |             |                  |        |             |             |         |           |           |                         | n/a                        |
| 54  | F   | POS        | 28.3    | 21.6    | POS          | ASK                |              |        |         |             |                  |        |             |             |         |           |           |                         | n/a                        |
| 57  | F   | POS        | 21.66   | 24.84   | POS          | ASK                |              |        |         |             |                  |        |             |             |         |           |           |                         | n/a                        |
| 60  | M   | POS        | 28.65   | 26.5    | POS          | ASK                |              |        |         |             |                  |        |             |             |         |           |           |                         | n/a                        |
| 61  | F   | POS        | 15.64   | 26.47   | POS          | ASK                |              |        |         |             |                  |        |             |             |         |           |           |                         | n/a                        |
| 61  | M   | POS        | 24.4    | 27.67   | POS          | ASK                |              |        |         |             |                  |        |             |             |         |           |           |                         | n/a                        |
| 61  | M   | POS        | 21.61   | 27.39   | POS          | ASK                |              |        |         |             |                  |        |             |             |         |           |           |                         | n/a                        |
| 63  | F   | POS        | 25.94   | 28.19   | POS          | ASK                |              |        |         |             |                  |        |             |             |         |           |           |                         | n/a                        |
| 64  | M   | POS        | 32.01   | 23.85   | POS          | ASK                |              |        |         |             |                  |        |             |             |         |           |           |                         | n/a                        |
| 65  | M   | POS        | 26.09   | 21.92   | POS          | ASK                |              |        |         |             |                  |        |             |             |         |           |           |                         | n/a                        |
| 67  | F   | POS        | 15.4    | 24.6    | POS          | ASK                |              |        |         |             |                  |        |             |             |         |           |           |                         | n/a                        |
| 71  | F   | POS        | 28.45   | 22.76   | POS          | ASK                |              |        |         |             |                  |        |             |             |         |           |           |                         | n/a                        |
| 71  | M   | POS        | 32.83   | 25.58   | POS          | ASK                |              |        |         |             |                  |        |             |             |         |           |           |                         | n/a                        |
| 79  | F   | POS        | 20.55   | 24.67   | POS          | ASK                |              |        |         |             |                  |        |             |             |         |           |           |                         | n/a                        |
| 29  | M   | POS        | 32.54   | 24.93   | NEG          | SK                 |              | Y      | Y       |             |                  | Y      | Y           | Y           |         |           |           |                         | 2                          |
| 32  | F   | POS        | 31.56   | 20.47   | NEG          | SK                 |              | Y      | Y       | Y           |                  |        | Y           | Y           |         |           |           |                         | 2                          |
| 63  | M   | POS        | 33.77   | 24.45   | NEG          | SK                 |              | Y      |         |             |                  |        |             |             |         |           |           |                         | 1                          |
| 19  | M   | POS        | 26.23   | 23.73   | POS          | SK                 | Y            |        | Y       | Y           |                  |        |             |             |         |           |           |                         | 3                          |
| 20  | F   | POS        | 20.47   | 22.8    | POS          | SK                 | Y            | Y      | Y       | Y           |                  |        | Y           | Y           |         |           |           |                         | 3                          |
| 20  | M   | POS        | 27.87   | 24.95   | POS          | SK                 | Y            | Y      |         |             |                  |        | Y           | Y           |         |           |           |                         | 4                          |
| 20  | M   | POS        | 14.55   | 22.4    | POS          | SK                 |              |        |         |             |                  |        | Y           |             |         |           |           |                         | 0                          |
| 21  | F   | POS        | 17.94   | 23.13   | POS          | SK                 |              | Y      | Y       |             | Y                |        | Y           | Y           |         |           |           |                         | 2                          |
| 21  | M   | POS        | 16.28   | 23.96   | POS          | SK                 |              | Y      | Y       | Y           |                  | Y      | Y           | Y           |         |           |           |                         | 2                          |
| 22  | F   | POS        | 20.59   | 21.94   | POS          | SK                 |              | Y      |         |             | Y                |        | Y           | Y           |         |           | Y         | Y                       | 3                          |
| 23  | F   | POS        | 20.16   | 27.91   | POS          | SK                 |              |        |         | Y           |                  |        | Y           | Y           |         | Y         |           | Y                       | 3                          |
| 23  | F   | POS        | 27.72   | 28.5    | POS          | SK                 | Y            | Y      | Y       | Y           |                  | Y      |             |             | Y       |           |           |                         | 2                          |
| 24  | M   | POS        | 20.41   | 28.39   | POS          | SK                 | Y            |        | Y       | Y           |                  | Y      | Y           | Y           |         |           |           | Y                       | 1                          |
| 25  | M   | POS        | 29.26   | 22.36   | POS          | SK                 | Y            | Y      |         | Y           |                  |        | Y           | Y           |         |           |           | Y                       | 4                          |
| 25  | F   | POS        | 20.81   | 25.63   | POS          | SK                 |              | Y      |         |             |                  | Y      | Y           |             |         |           |           | Y                       | 2                          |
| 25  | F   | POS        | 19.47   | 21.79   | POS          | SK                 | Y            | Y      |         | Y           |                  |        | Y           | Y           |         |           |           | Y                       | 3                          |
| 25  | M   | POS        | 26.26   | 24.39   | POS          | SK                 | Y            | Y      | Y       | Y           |                  | Y      | Y           |             |         |           |           |                         | 3                          |
| 26  | M   | POS        | 15.62   | 24.26   | POS          | SK                 | Y            |        |         |             |                  |        | Y           | Y           |         |           |           |                         | 1                          |
| 26  | F   | POS        | 19.19   | 22.21   | POS          | SK                 | Y            | Y      |         |             |                  |        |             |             |         |           |           |                         | 2                          |
| 27  | F   | POS        | 17.79   | 25.23   | POS          | SK                 | Y            | Y      | Y       | Y           |                  |        | Y           | Y           |         |           |           |                         | 2                          |

|    |   |     |       |       |     |      |   |   |   |   |   |   |   |   |   |   |   |   |    |
|----|---|-----|-------|-------|-----|------|---|---|---|---|---|---|---|---|---|---|---|---|----|
| 27 | M | POS | 15.95 | 24.3  | POS | Sx   | Y |   |   | Y |   |   | Y | Y | Y |   |   |   | 2  |
| 27 | F | POS | 18.81 | 23.78 | POS | Sx   |   | Y | Y | Y |   | Y | Y |   |   |   |   |   | 2  |
| 28 | M | POS | 25.41 | 24.61 | POS | Sx   |   |   | Y | Y |   | Y |   | Y |   | Y | Y |   | 4  |
| 29 | F | POS | 16.5  | 21.78 | POS | Sx   |   |   |   |   |   |   |   |   |   |   |   | Y | 0  |
| 29 | M | POS | 18.2  | 23.42 | POS | Sx   |   |   |   |   |   | Y |   |   |   |   |   |   | 1  |
| 30 | M | POS | 27.23 | 29.61 | POS | Sx   |   | Y | Y | Y |   |   | Y | Y | Y |   |   |   | 2  |
| 31 | F | POS | 25.48 | 24.96 | POS | Sx   | Y | Y | Y | Y | Y | Y | Y |   |   |   |   |   | 3  |
| 31 | F | POS | 18.33 | 25.67 | POS | Sx   |   | Y | Y |   |   |   | Y |   |   |   |   |   | 1  |
| 31 | F | POS | 21.89 | 26.98 | POS | Sx   |   | Y |   | Y | Y |   | Y | Y |   |   |   | Y | 4  |
| 31 | F | POS | 15.21 | 23.27 | POS | Sx   | Y | Y | Y | Y | Y | Y | Y | Y | Y | Y | Y | Y | 4  |
| 31 | M | POS | 16.17 | 21.38 | POS | Sx   |   | Y | Y | Y |   | Y | Y | Y | Y | Y | Y | Y | 0  |
| 32 | F | POS | 29.47 | 26.43 | POS | Sx   |   |   |   | Y |   | Y | Y | Y | Y |   | Y |   | 6  |
| 32 | F | POS | 13.77 | 24.14 | POS | Sx   |   |   |   |   |   |   | Y |   |   |   |   |   | 1  |
| 32 | M | POS | 26.76 | 24.76 | POS | Sx   |   | Y |   | Y |   |   | Y |   |   |   |   | Y | 3  |
| 33 | M | POS | 24.36 | 21.6  | POS | Sx   |   |   | Y |   |   |   |   | Y |   |   |   | Y | 3  |
| 33 | F | POS | 14.32 | 22.84 | POS | Sx   | Y | Y |   | Y |   |   | Y |   |   |   |   |   | 1  |
| 33 | F | POS | 17.12 | 21.83 | POS | Sx   |   |   | Y | Y |   |   | Y | Y |   |   |   |   | 1  |
| 34 | M | POS | 27.63 | 26.65 | POS | Sx   |   | Y |   | Y |   |   |   | Y |   |   | Y |   | 2  |
| 34 | F | POS | 30.52 | 23.25 | POS | Sx   | Y |   |   | Y |   |   | Y | Y |   |   | Y | Y | 5  |
| 34 | M | POS | 18.75 | 22.42 | POS | Sx   | Y | Y |   | Y |   |   | Y |   |   |   |   |   | 3  |
| 35 | F | POS | 22.88 | 28.59 | POS | Sx   |   | Y | Y | Y | Y |   |   |   |   | Y |   | Y | 1  |
| 35 | F | POS | 16.4  | 22.27 | POS | Sx   | Y |   |   | Y |   |   |   |   |   |   |   |   | 1  |
| 35 | F | POS | 20.19 | 22.43 | POS | Sx   | Y | Y | Y | Y |   | Y | Y |   |   |   | Y | Y | 3  |
| 35 | M | POS | 25.06 | 26.91 | POS | Sx   | Y | Y |   |   |   | Y |   |   |   |   |   | Y | 2  |
| 35 | M | POS | 27.25 | 22.99 | POS | Sx   | Y | Y | Y | Y |   |   | Y | Y | Y |   |   |   | 3  |
| 36 | F | POS | 22.81 | 27.54 | POS | Sx   |   | Y |   | Y |   |   | Y |   |   |   |   |   | 1  |
| 37 | F | POS | 19.5  | 26.99 | POS | Sx   | Y |   |   | Y | Y |   | Y | Y | Y |   |   | Y | 2  |
| 37 | M | POS | 22.18 | 21.61 | POS | Sx   | Y | Y | Y |   |   |   |   |   |   |   |   |   | 2  |
| 38 | M | POS | 18.33 | 27.29 | POS | Sx   | Y | Y | Y |   | Y | Y | Y |   |   |   |   |   | 6  |
| 38 | F | POS | 31.41 | 22.64 | POS | Sx   | Y | Y | Y | Y | Y |   | Y | Y | Y |   |   |   | 1  |
| 38 | F | POS | 28.04 | 22.86 | POS | Sx   |   |   |   |   | Y |   |   |   |   |   |   | Y | 2  |
| 39 | M | POS | 29.14 | 29.32 | POS | Sx   |   | Y | Y | Y | Y | Y | Y | Y |   |   |   | Y | 6  |
| 39 | F | POS | 15.41 | 22.8  | POS | Sx   | Y | Y | Y | Y | Y | Y |   |   |   |   | Y |   | 1  |
| 40 | M | POS | 20.77 | 24.58 | POS | Sx   |   | Y | Y | Y | Y |   |   |   |   |   |   | Y | 1  |
| 40 | F | POS | 21.26 | 25.98 | POS | Sx   | Y | Y | Y | Y |   | Y | Y | Y |   |   |   |   | 5  |
| 40 | M | POS | 23.03 | 20.72 | POS | Sx   | Y |   |   |   |   | Y |   |   |   |   |   | Y | 2  |
| 41 | M | POS | 17.23 | 24.19 | POS | Sx   |   |   |   |   | Y |   |   |   |   |   |   |   | 3  |
| 41 | M | POS | 19.24 | 21.43 | POS | Sx   | Y | Y |   | Y | Y | Y |   |   |   |   |   |   | 2  |
| 42 | M | POS | 23.2  | 24.16 | POS | Sx   | Y | Y | Y | Y | Y | Y | Y |   |   |   | Y |   | 2  |
| 44 | F | POS | 17.67 | 25.61 | POS | Sx   |   | Y | Y | Y |   |   |   |   |   |   |   |   | 1  |
| 44 | F | POS | 15.2  | 22.19 | POS | Sx   | Y | Y |   | Y | Y |   |   |   |   |   |   |   | 3  |
| 45 | M | POS | 18.7  | 23.76 | POS | Sx   |   | Y | Y |   |   |   |   |   |   |   |   |   | 3  |
| 45 | F | POS | 21.15 | 24.76 | POS | Sx   | Y | Y | Y | Y |   | Y | Y | Y |   |   |   |   | 3  |
| 46 | F | POS | 15.2  | 27.54 | POS | Sx   | Y | Y |   | Y |   |   | Y |   |   |   |   |   | 2  |
| 47 | F | POS | 32.6  | 27.59 | POS | Sx   | Y | Y | Y | Y | Y |   |   | Y | Y |   | Y | Y | 6  |
| 47 | M | POS | 26.77 | 23.56 | POS | Sx   | Y | Y | Y | Y |   | Y |   |   |   |   |   |   | 5  |
| 48 | F | POS | 34.58 | 24.96 | POS | Sx   | Y | Y | Y | Y | Y | Y | Y |   |   |   | Y |   | 3  |
| 48 | M | POS | 21.82 | 24.66 | POS | Sx   |   |   | Y | Y |   | Y |   | Y |   |   |   |   | 2  |
| 49 | M | POS | 30.73 | 21.95 | POS | Sx   |   | Y |   |   |   |   |   |   |   |   |   |   | 5  |
| 49 | M | POS | 19.16 | 21.67 | POS | Sx   |   |   |   |   | Y |   |   |   |   |   |   |   | 0  |
| 50 | F | POS | 20.45 | 21.07 | POS | Sx   | Y | Y | Y | Y | Y | Y | Y |   |   |   |   |   | 0  |
| 51 | F | POS | 16.57 | 26.99 | POS | Sx   |   | Y | Y | Y |   |   | Y | Y |   |   | Y |   | 1  |
| 51 | M | POS | 15.46 | 21.47 | POS | Sx   | Y | Y | Y | Y |   |   |   |   |   |   |   |   | 1  |
| 54 | M | POS | 24.18 | 24.5  | POS | Sx   |   | Y |   | Y |   | Y |   |   |   |   |   |   | 1  |
| 54 | F | POS | 16.92 | 22.82 | POS | Sx   | Y | Y | Y |   | Y |   |   |   |   |   |   | Y | 3  |
| 54 | M | POS | 11.78 | 18.96 | POS | Sx   |   |   |   | Y | Y | Y |   | Y |   |   |   | Y | 1  |
| 57 | M | POS | 18.69 | 28.26 | POS | Sx   |   |   | Y | Y | Y | Y | Y | Y |   |   |   |   | 1  |
| 57 | F | POS | 21.8  | 24.73 | POS | Sx   | Y | Y |   | Y |   | Y |   |   |   |   |   |   | 1  |
| 60 | F | POS | 16.18 | 25.74 | POS | Sx   | Y |   |   | Y |   |   |   |   |   |   |   |   | 1  |
| 61 | M | POS | 18.82 | 25.48 | POS | Sx   |   | Y | Y |   |   | Y | Y |   |   |   |   |   | 2  |
| 65 | F | POS | 14.61 | 23.24 | POS | Sx   |   | Y | Y | Y |   |   | Y | Y |   |   |   |   | 3  |
| 66 | M | POS | 15.35 | 18.78 | POS | Sx   | Y | Y | Y | Y | Y | Y | Y | Y | Y |   |   |   | 3  |
| 67 | M | POS | 33.69 | 25.16 | POS | Sx   |   |   |   |   | Y |   | Y | Y |   |   |   |   | 2  |
| 70 | M | POS | 26.78 | 26.3  | POS | Sx   | Y | Y | Y | Y | Y | Y | Y |   |   |   |   |   | 0  |
| 70 | M | POS | 22    | 25.3  | POS | Sx   |   | Y |   |   |   |   |   |   |   |   |   |   | 2  |
| 32 | M | POS | 34.2  | 26.37 | NEG | Sx7+ |   |   |   | Y | Y |   | Y |   |   |   | Y | Y | 7+ |
| 32 | F | POS | 34.05 | 23.27 | NEG | Sx7+ |   |   |   |   |   |   |   |   |   |   |   | Y | 7+ |
| 33 | F | POS | 33.79 | 25.58 | NEG | Sx7+ |   | Y |   | Y | Y |   |   | Y |   |   | Y |   | 7+ |
| 43 | M | POS | 34.56 | 25.89 | NEG | Sx7+ |   | Y | Y | Y |   |   | Y | Y |   |   |   |   | 7+ |
| 67 | F | POS | 30.4  | 25.95 | NEG | Sx7+ |   |   |   |   |   |   |   | Y |   |   |   |   | 7+ |
| 19 | F | POS | 22.78 | 22.71 | POS | Sx7+ |   |   |   |   |   |   | Y | Y |   |   |   |   | 7+ |
| 20 | M | POS | 29.39 | 22.48 | POS | Sx7+ |   |   |   | Y | Y |   |   | Y | Y |   |   |   | 7+ |
| 25 | F | POS | 29.8  | 24.6  | POS | Sx7+ |   | Y |   |   |   |   | Y | Y |   |   |   |   | 7+ |
| 30 | F | POS | 17.71 | 27.39 | POS | Sx7+ | Y | Y |   |   |   |   |   | Y |   |   |   |   | 7+ |
| 30 | M | POS | 14.71 | 23.66 | POS | Sx7+ | Y | Y | Y |   |   |   |   |   |   |   |   |   | 7+ |
| 34 | M | POS | 25.94 | 26.03 | POS | Sx7+ | Y | Y |   | Y |   |   | Y |   |   |   |   | Y | 7+ |
| 43 | F | POS | 27.12 | 19.54 | POS | Sx7+ |   |   |   |   |   |   |   |   |   |   |   | Y | 7+ |
| 50 | F | POS | 34.56 | 24.45 | POS | Sx7+ |   |   |   |   |   | Y | Y |   |   |   |   | Y | 7+ |
| 53 | M | POS | 17.8  | 23.87 | POS | Sx7+ |   | Y | Y |   |   | Y |   |   |   |   |   |   | 7+ |
| 68 | M | POS | 20.24 | 23.53 | POS | Sx7+ |   | Y |   |   | Y |   |   |   |   |   |   | Y | 7+ |

F, female; M, male; POS, positive; Ct, cycle threshold; N2, SARS-CoV-2 target; RP, host control target; ASx, asymptomatic; Sx, symptomatic; n/a, not applicable

## Supplementary Table 2

### Abbott BinaxNow results, RT-PCR Ct values, and symptoms in RT-PCR-positive children

| Age | Sex | PCR Result | Ct (N2) | Ct (RP) | Binax Result | COVID-19 symptoms? | Sore throat? | Cough? | Chills? | Body Aches? | Short of Breath? | Fever? | Runny Nose? | Congestion? | Nausea? | Vomiting? | Diarrhea? | Loss of Taste or Smell? | # Days Since Symptom Onset |
|-----|-----|------------|---------|---------|--------------|--------------------|--------------|--------|---------|-------------|------------------|--------|-------------|-------------|---------|-----------|-----------|-------------------------|----------------------------|
| 0   | F   | POS        | 33.59   | 21.55   | NEG          | ASK                |              |        |         |             |                  |        |             |             |         |           |           |                         | n/a                        |
| 0   | M   | POS        | 29.89   | 20.61   | NEG          | ASK                |              |        |         |             |                  |        |             |             |         |           |           |                         | n/a                        |
| 1   | M   | POS        | 34.26   | 21.97   | NEG          | ASK                |              |        |         |             |                  |        |             |             |         |           |           |                         | n/a                        |
| 2   | M   | POS        | 37.1    | 26.4    | NEG          | ASK                |              |        |         |             |                  |        |             |             |         |           |           |                         | n/a                        |
| 3   | F   | POS        | 31.7    | 21.76   | NEG          | ASK                |              |        |         |             |                  |        |             |             |         |           |           |                         | n/a                        |
| 3   | F   | POS        | 26.7    | 19.84   | NEG          | ASK                |              |        |         |             |                  |        |             |             |         |           |           |                         | n/a                        |
| 3   | F   | POS        | 36.51   | 24.03   | NEG          | ASK                |              |        |         |             |                  |        |             |             |         |           |           |                         | n/a                        |
| 3   | M   | POS        | 28.93   | 21.76   | NEG          | ASK                |              |        |         |             |                  |        |             |             |         |           |           |                         | n/a                        |
| 3   | M   | POS        | 32.44   | 24.73   | NEG          | ASK                |              |        |         |             |                  |        |             |             |         |           |           |                         | n/a                        |
| 3   | F   | POS        | 32.31   | 22.46   | NEG          | ASK                |              |        |         |             |                  |        |             |             |         |           |           |                         | n/a                        |
| 5   | M   | POS        | 32.87   | 26.98   | NEG          | ASK                |              |        |         |             |                  |        |             |             |         |           |           |                         | n/a                        |
| 6   | F   | POS        | 26.82   | 22.58   | NEG          | ASK                |              |        |         |             |                  |        |             |             |         |           |           |                         | n/a                        |
| 7   | F   | POS        | 33.01   | 20.2    | NEG          | ASK                |              |        |         |             |                  |        |             |             |         |           |           |                         | n/a                        |
| 7   | F   | POS        | 30.99   | 21.65   | NEG          | ASK                |              |        |         |             |                  |        |             |             |         |           |           |                         | n/a                        |
| 7   | F   | POS        | 33.72   | 23.35   | NEG          | ASK                |              |        |         |             |                  |        |             |             |         |           |           |                         | n/a                        |
| 7   | M   | POS        | 36.31   | 24.21   | NEG          | ASK                |              |        |         |             |                  |        |             |             |         |           |           |                         | n/a                        |
| 8   | M   | POS        | 34.62   | 22.23   | NEG          | ASK                |              |        |         |             |                  |        |             |             |         |           |           |                         | n/a                        |
| 9   | M   | POS        | 34.34   | 22.58   | NEG          | ASK                |              |        |         |             |                  |        |             |             |         |           |           |                         | n/a                        |
| 9   | M   | POS        | 27.42   | 21.64   | NEG          | ASK                |              |        |         |             |                  |        |             |             |         |           |           |                         | n/a                        |
| 10  | F   | POS        | 32.47   | 22.45   | NEG          | ASK                |              |        |         |             |                  |        |             |             |         |           |           |                         | n/a                        |
| 10  | M   | POS        | 34.07   | 25.45   | NEG          | ASK                |              |        |         |             |                  |        |             |             |         |           |           |                         | n/a                        |
| 12  | F   | POS        | 27.45   | 24.01   | NEG          | ASK                |              |        |         |             |                  |        |             |             |         |           |           |                         | n/a                        |
| 12  | M   | POS        | 39.84   | 24.35   | NEG          | ASK                |              |        |         |             |                  |        |             |             |         |           |           |                         | n/a                        |
| 12  | M   | POS        | 23.43   | 20.22   | NEG          | ASK                |              |        |         |             |                  |        |             |             |         |           |           |                         | n/a                        |
| 12  | F   | POS        | 32.83   | 24.29   | NEG          | ASK                |              |        |         |             |                  |        |             |             |         |           |           |                         | n/a                        |
| 13  | F   | POS        | 26.89   | 21.82   | NEG          | ASK                |              |        |         |             |                  |        |             |             |         |           |           |                         | n/a                        |
| 14  | F   | POS        | 32.78   | 23.33   | NEG          | ASK                |              |        |         |             |                  |        |             |             |         |           |           |                         | n/a                        |
| 15  | F   | POS        | 36.84   | 20.19   | NEG          | ASK                |              |        |         |             |                  |        |             |             |         |           |           |                         | n/a                        |
| 15  | F   | POS        | 33.39   | 22.53   | NEG          | ASK                |              |        |         |             |                  |        |             |             |         |           |           |                         | n/a                        |
| 16  | M   | POS        | 36.5    | 19.31   | NEG          | ASK                |              |        |         |             |                  |        |             |             |         |           |           |                         | n/a                        |
| 16  | F   | POS        | 33.08   | 22.33   | NEG          | ASK                |              |        |         |             |                  |        |             |             |         |           |           |                         | n/a                        |
| 16  | F   | POS        | 33.5    | 19.98   | NEG          | ASK                |              |        |         |             |                  |        |             |             |         |           |           |                         | n/a                        |
| 16  | F   | POS        | 35.4    | 22.32   | NEG          | ASK                |              |        |         |             |                  |        |             |             |         |           |           |                         | n/a                        |
| 17  | F   | POS        | 34.88   | 24.47   | NEG          | ASK                |              |        |         |             |                  |        |             |             |         |           |           |                         | n/a                        |
| 17  | M   | POS        | 34.47   | 25.58   | NEG          | ASK                |              |        |         |             |                  |        |             |             |         |           |           |                         | n/a                        |
| 18  | F   | POS        | 32.22   | 21.37   | NEG          | ASK                |              |        |         |             |                  |        |             |             |         |           |           |                         | n/a                        |
| 18  | F   | POS        | 33.9    | 26.17   | NEG          | ASK                |              |        |         |             |                  |        |             |             |         |           |           |                         | n/a                        |
| 0   | M   | POS        | 13.48   | 23.3    | POS          | ASK                |              |        |         |             |                  |        |             |             |         |           |           |                         | n/a                        |
| 0   | F   | POS        | 17.72   | 27.64   | POS          | ASK                |              |        |         |             |                  |        |             |             |         |           |           |                         | n/a                        |
| 0   | F   | POS        | 32.61   | 20.25   | POS          | ASK                |              |        |         |             |                  |        |             |             |         |           |           |                         | n/a                        |
| 1   | F   | POS        | 27.34   | 21.61   | POS          | ASK                |              |        |         |             |                  |        |             |             |         |           |           |                         | n/a                        |
| 1   | M   | POS        | 14.35   | 20.71   | POS          | ASK                |              |        |         |             |                  |        |             |             |         |           |           |                         | n/a                        |
| 1   | M   | POS        | 19.05   | 26.8    | POS          | ASK                |              |        |         |             |                  |        |             |             |         |           |           |                         | n/a                        |
| 2   | F   | POS        | 29.77   | 25.68   | POS          | ASK                |              |        |         |             |                  |        |             |             |         |           |           |                         | n/a                        |
| 2   | F   | POS        | 25.61   | 19.76   | POS          | ASK                |              |        |         |             |                  |        |             |             |         |           |           |                         | n/a                        |
| 2   | M   | POS        | 16.75   | 20.83   | POS          | ASK                |              |        |         |             |                  |        |             |             |         |           |           |                         | n/a                        |
| 2   | F   | POS        | 21.51   | 20.22   | POS          | ASK                |              |        |         |             |                  |        |             |             |         |           |           |                         | n/a                        |
| 2   | F   | POS        | 22.88   | 20.41   | POS          | ASK                |              |        |         |             |                  |        |             |             |         |           |           |                         | n/a                        |
| 3   | F   | POS        | 23.96   | 22.89   | POS          | ASK                |              |        |         |             |                  |        |             |             |         |           |           |                         | n/a                        |
| 3   | F   | POS        | 20.94   | 20.45   | POS          | ASK                |              |        |         |             |                  |        |             |             |         |           |           |                         | n/a                        |
| 3   | M   | POS        | 25.56   | 20.35   | POS          | ASK                |              |        |         |             |                  |        |             |             |         |           |           |                         | n/a                        |
| 4   | M   | POS        | 21.68   | 19      | POS          | ASK                |              |        |         |             |                  |        |             |             |         |           |           |                         | n/a                        |
| 5   | M   | POS        | 27.84   | 18.48   | POS          | ASK                |              |        |         |             |                  |        |             |             |         |           |           |                         | n/a                        |
| 6   | F   | POS        | 29.61   | 19.83   | POS          | ASK                |              |        |         |             |                  |        |             |             |         |           |           |                         | n/a                        |
| 6   | M   | POS        | 17.63   | 21.84   | POS          | ASK                |              |        |         |             |                  |        |             |             |         |           |           |                         | n/a                        |
| 6   | M   | POS        | 13.11   | 20.96   | POS          | ASK                |              |        |         |             |                  |        |             |             |         |           |           |                         | n/a                        |
| 6   | M   | POS        | 21.53   | 24.64   | POS          | ASK                |              |        |         |             |                  |        |             |             |         |           |           |                         | n/a                        |
| 7   | M   | POS        | 27.57   | 22.55   | POS          | ASK                |              |        |         |             |                  |        |             |             |         |           |           |                         | n/a                        |
| 7   | F   | POS        | 21.51   | 22.87   | POS          | ASK                |              |        |         |             |                  |        |             |             |         |           |           |                         | n/a                        |
| 7   | M   | POS        | 14.5    | 23.54   | POS          | ASK                |              |        |         |             |                  |        |             |             |         |           |           |                         | n/a                        |
| 7   | M   | POS        | 22.1    | 28.85   | POS          | ASK                |              |        |         |             |                  |        |             |             |         |           |           |                         | n/a                        |
| 7   | F   | POS        | 27.82   | 23.9    | POS          | ASK                |              |        |         |             |                  |        |             |             |         |           |           |                         | n/a                        |
| 7   | F   | POS        | 29.83   | 20.78   | POS          | ASK                |              |        |         |             |                  |        |             |             |         |           |           |                         | n/a                        |
| 7   | F   | POS        | 18.13   | 24.45   | POS          | ASK                |              |        |         |             |                  |        |             |             |         |           |           |                         | n/a                        |
| 8   | F   | POS        | 18.38   | 28.23   | POS          | ASK                |              |        |         |             |                  |        |             |             |         |           |           |                         | n/a                        |
| 8   | F   | POS        | 15.28   | 22.14   | POS          | ASK                |              |        |         |             |                  |        |             |             |         |           |           |                         | n/a                        |
| 8   | F   | POS        | 14.66   | 20.35   | POS          | ASK                |              |        |         |             |                  |        |             |             |         |           |           |                         | n/a                        |

|    |   |     |       |       |     |      |  |   |   |   |   |   |   |   |   |   |   |   |  |   |     |
|----|---|-----|-------|-------|-----|------|--|---|---|---|---|---|---|---|---|---|---|---|--|---|-----|
| 8  | F | POS | 32.73 | 21.97 | POS | ASx  |  |   |   |   |   |   |   |   |   |   |   |   |  |   | n/a |
| 8  | M | POS | 22.99 | 22.95 | POS | ASx  |  |   |   |   |   |   |   |   |   |   |   |   |  |   | n/a |
| 8  | F | POS | 22.4  | 24.28 | POS | ASx  |  |   |   |   |   |   |   |   |   |   |   |   |  |   | n/a |
| 9  | F | POS | 19.96 | 22.67 | POS | ASx  |  |   |   |   |   |   |   |   |   |   |   |   |  |   | n/a |
| 9  | F | POS | 15.45 | 21.72 | POS | ASx  |  |   |   |   |   |   |   |   |   |   |   |   |  |   | n/a |
| 9  | F | POS | 23.99 | 19.95 | POS | ASx  |  |   |   |   |   |   |   |   |   |   |   |   |  |   | n/a |
| 9  | M | POS | 34.59 | 22.05 | POS | ASx  |  |   |   |   |   |   |   |   |   |   |   |   |  |   | n/a |
| 9  | M | POS | 20.54 | 23.4  | POS | ASx  |  |   |   |   |   |   |   |   |   |   |   |   |  |   | n/a |
| 9  | F | POS | 14.54 | 21.84 | POS | ASx  |  |   |   |   |   |   |   |   |   |   |   |   |  |   | n/a |
| 10 | M | POS | 35.88 | 25.08 | POS | ASx  |  |   |   |   |   |   |   |   |   |   |   |   |  |   | n/a |
| 10 | F | POS | 26.85 | 24.5  | POS | ASx  |  |   |   |   |   |   |   |   |   |   |   |   |  |   | n/a |
| 11 | F | POS | 16.98 | 24.86 | POS | ASx  |  |   |   |   |   |   |   |   |   |   |   |   |  |   | n/a |
| 11 | M | POS | 33    | 26.48 | POS | ASx  |  |   |   |   |   |   |   |   |   |   |   |   |  |   | n/a |
| 11 | M | POS | 29.63 | 20.77 | POS | ASx  |  |   |   |   |   |   |   |   |   |   |   |   |  |   | n/a |
| 12 | F | POS | 17.77 | 23.91 | POS | ASx  |  |   |   |   |   |   |   |   |   |   |   |   |  |   | n/a |
| 12 | F | POS | 19.38 | 21.69 | POS | ASx  |  |   |   |   |   |   |   |   |   |   |   |   |  |   | n/a |
| 12 | M | POS | 28.13 | 24.42 | POS | ASx  |  |   |   |   |   |   |   |   |   |   |   |   |  |   | n/a |
| 12 | M | POS | 26.13 | 21.43 | POS | ASx  |  |   |   |   |   |   |   |   |   |   |   |   |  |   | n/a |
| 13 | F | POS | 21.41 | 26.51 | POS | ASx  |  |   |   |   |   |   |   |   |   |   |   |   |  |   | n/a |
| 13 | M | POS | 15.02 | 23.09 | POS | ASx  |  |   |   |   |   |   |   |   |   |   |   |   |  |   | n/a |
| 13 | M | POS | 18.81 | 22.28 | POS | ASx  |  |   |   |   |   |   |   |   |   |   |   |   |  |   | n/a |
| 14 | M | POS | 23    | 23.72 | POS | ASx  |  |   |   |   |   |   |   |   |   |   |   |   |  |   | n/a |
| 14 | F | POS | 34.35 | 25.54 | POS | ASx  |  |   |   |   |   |   |   |   |   |   |   |   |  |   | n/a |
| 14 | F | POS | 25.82 | 24.55 | POS | ASx  |  |   |   |   |   |   |   |   |   |   |   |   |  |   | n/a |
| 15 | M | POS | 23.74 | 20.75 | POS | ASx  |  |   |   |   |   |   |   |   |   |   |   |   |  |   | n/a |
| 15 | M | POS | 32.1  | 22.45 | POS | ASx  |  |   |   |   |   |   |   |   |   |   |   |   |  |   | n/a |
| 15 | F | POS | 21.48 | 22.93 | POS | ASx  |  |   |   |   |   |   |   |   |   |   |   |   |  |   | n/a |
| 15 | M | POS | 24.18 | 22.59 | POS | ASx  |  |   |   |   |   |   |   |   |   |   |   |   |  |   | n/a |
| 15 | M | POS | 16.09 | 23.35 | POS | ASx  |  |   |   |   |   |   |   |   |   |   |   |   |  |   | n/a |
| 15 | F | POS | 21.04 | 23.6  | POS | ASx  |  |   |   |   |   |   |   |   |   |   |   |   |  |   | n/a |
| 15 | F | POS | 20.9  | 23.6  | POS | ASx  |  |   |   |   |   |   |   |   |   |   |   |   |  |   | n/a |
| 15 | F | POS | 30.4  | 25.71 | POS | ASx  |  |   |   |   |   |   |   |   |   |   |   |   |  |   | n/a |
| 16 | M | POS | 16.99 | 21.01 | POS | ASx  |  |   |   |   |   |   |   |   |   |   |   |   |  |   | n/a |
| 16 | F | POS | 18.29 | 23.6  | POS | ASx  |  |   |   |   |   |   |   |   |   |   |   |   |  |   | n/a |
| 17 | F | POS | 19.81 | 21.22 | POS | ASx  |  |   |   |   |   |   |   |   |   |   |   |   |  |   | n/a |
| 17 | F | POS | 18.1  | 22.44 | POS | ASx  |  |   |   |   |   |   |   |   |   |   |   |   |  |   | n/a |
| 17 | F | POS | 17.2  | 24.71 | POS | ASx  |  |   |   |   |   |   |   |   |   |   |   |   |  |   | n/a |
| 17 | F | POS | 24.45 | 24.72 | POS | ASx  |  |   |   |   |   |   |   |   |   |   |   |   |  |   | n/a |
| 17 | F | POS | 21.3  | 26.47 | POS | ASx  |  |   |   |   |   |   |   |   |   |   |   |   |  |   | n/a |
| 18 | F | POS | 35.73 | 23.96 | POS | ASx  |  |   |   |   |   |   |   |   |   |   |   |   |  |   | n/a |
| 12 | F | POS | 27.2  | 22.72 | NEG | Sx   |  |   |   | Y |   | Y |   | Y |   |   |   |   |  |   | 0   |
| 12 | F | POS | 35.74 | 25.98 | NEG | Sx   |  |   |   | Y |   |   |   |   |   | Y |   | Y |  |   | 1   |
| 14 | F | POS | 31.43 | 27.78 | NEG | Sx   |  | Y | Y | Y | Y | Y | Y | Y | Y | Y | Y | Y |  |   | 4   |
| 15 | F | POS | 34.2  | 27.7  | NEG | Sx   |  | Y |   |   |   |   |   |   |   | Y |   |   |  |   | 1   |
| 1  | M | POS | 13.91 | 19.02 | POS | Sx   |  | Y |   |   |   |   |   |   |   | Y |   |   |  |   | 6   |
| 1  | M | POS | 15.21 | 25.39 | POS | Sx   |  |   |   |   |   |   |   | Y | Y | Y |   |   |  |   | 1   |
| 7  | F | POS | 26.84 | 26.63 | POS | Sx   |  |   |   | Y |   |   |   |   |   |   |   |   |  |   | 2   |
| 9  | M | POS | 32.74 | 22.38 | POS | Sx   |  |   |   | Y | Y | Y | Y | Y | Y |   |   |   |  | Y | 1   |
| 9  | F | POS | 14.62 | 22.48 | POS | Sx   |  |   |   | Y |   | Y | Y | Y |   | Y |   |   |  |   | 2   |
| 10 | F | POS | 26.34 | 25.6  | POS | Sx   |  | Y |   |   |   |   |   |   |   |   |   |   |  | Y | 2   |
| 10 | F | POS | 20.87 | 26.76 | POS | Sx   |  |   |   |   | Y |   |   |   |   | Y | Y | Y |  |   | 1   |
| 11 | M | POS | 16.5  | 25.98 | POS | Sx   |  | Y | Y | Y |   |   |   |   |   | Y | Y |   |  | Y | 2   |
| 11 | M | POS | 27.67 | 20.53 | POS | Sx   |  | Y |   |   |   |   |   |   |   | Y |   |   |  |   | 4   |
| 12 | M | POS | 26.22 | 26.25 | POS | Sx   |  | Y | Y | Y | Y | Y | Y | Y | Y | Y | Y | Y |  |   | 5   |
| 14 | F | POS | 12.21 | 23.05 | POS | Sx   |  | Y | Y | Y | Y | Y | Y |   |   | Y | Y |   |  |   | 3   |
| 14 | F | POS | 21.13 | 22.5  | POS | Sx   |  | Y | Y | Y | Y | Y |   |   |   |   |   |   |  |   | 2   |
| 14 | F | POS | 20.34 | 22.95 | POS | Sx   |  | Y |   | Y | Y |   |   |   | Y |   |   | Y |  |   | 2   |
| 14 | M | POS | 17.74 | 23.27 | POS | Sx   |  | Y | Y | Y | Y | Y | Y |   |   | Y | Y | Y |  |   | 7   |
| 16 | F | POS | 26.61 | 25.71 | POS | Sx   |  | Y | Y |   | Y | Y | Y |   |   | Y |   |   |  | Y | 6   |
| 17 | F | POS | 21.69 | 26.48 | POS | Sx   |  |   |   | Y |   | Y |   |   |   |   | Y |   |  | Y | 4   |
| 17 | F | POS | 25.69 | 23.37 | POS | Sx   |  | Y | Y | Y |   |   |   | Y |   |   |   |   |  | Y | 0   |
| 18 | F | POS | 24.75 | 27.03 | POS | Sx   |  | Y |   |   |   |   |   |   |   |   |   |   |  |   | 1   |
| 18 | M | POS | 14.9  | 21.68 | POS | Sx   |  |   | Y |   |   | Y | Y |   |   |   |   |   |  |   | 1   |
| 18 | F | POS | 30.63 | 22.9  | POS | Sx   |  | Y |   |   | Y |   |   |   |   | Y | Y | Y |  |   | 1   |
| 18 | F | POS | 23.55 | 20.27 | POS | Sx   |  | Y |   | Y | Y | Y | Y | Y | Y | Y | Y | Y |  | Y | 4   |
| 18 | M | POS | 15.69 | 21.66 | POS | Sx   |  |   | Y |   | Y |   |   |   |   | Y | Y |   |  |   | 1   |
| 2  | F | POS | 27.65 | 25.53 | POS | Sx7+ |  |   |   | Y |   | Y |   |   |   |   |   |   |  | Y | 15  |
| 18 | F | POS | 26.79 | 27.71 | POS | Sx7+ |  |   |   | Y |   | Y |   |   |   |   | Y | Y |  | Y | 11  |

F, female; M, male; POS, positive; Ct, cycle threshold; N2, SARS-CoV-2 target; RP, host control target; ASx, asymptomatic; Sx, symptomatic; n/a, not applicable



### Supplementary Table 3

#### Distribution of positive and negative BinaxNOW and RT-PCR results across clinical subgroups

| Asymptomatic (Children: ≤18 yo) |          |          |       |
|---------------------------------|----------|----------|-------|
| BinaxNOW Ag                     | RT-PCR   |          |       |
|                                 | Positive | Negative | Total |
| Positive                        | 70       | 7        | 77    |
| Negative                        | 37       | 715      | 752   |
| Total (12.9% prevalence)        | 107      | 722      | 829   |

| Asymptomatic (Adults: >18 yo) |          |          |       |
|-------------------------------|----------|----------|-------|
| BinaxNOW Ag                   | RT-PCR   |          |       |
|                               | Positive | Negative | Total |
| Positive                      | 40       | 4        | 44    |
| Negative                      | 17       | 913      | 930   |
| Total (5.9% prevalence)       | 57       | 917      | 974   |

| Symptomatic ≤7 days (Children: ≤18 yo) |          |          |       |
|----------------------------------------|----------|----------|-------|
| BinaxNOW Ag                            | RT-PCR   |          |       |
|                                        | Positive | Negative | Total |
| Positive                               | 22       | 0        | 22    |
| Negative                               | 4        | 65       | 69    |
| Total (28.6% prevalence)               | 26       | 65       | 91    |

| Symptomatic ≤7 days (Adults: >18 yo) |          |          |       |
|--------------------------------------|----------|----------|-------|
| BinaxNOW Ag                          | RT-PCR   |          |       |
|                                      | Positive | Negative | Total |
| Positive                             | 82       | 0        | 82    |
| Negative                             | 3        | 270      | 273   |
| Total (23.9% prevalence)             | 85       | 270      | 355   |

| Symptomatic (Children: >7 days) |          |          |       |
|---------------------------------|----------|----------|-------|
| BinaxNOW Ag                     | RT-PCR   |          |       |
|                                 | Positive | Negative | Total |
| Positive                        | 2        | 0        | 2     |
| Negative                        | 0        | 6        | 6     |
| Total (25% Prevalence)          | 2        | 6        | 8     |

| Symptomatic (Adults: >7 days) |          |          |       |
|-------------------------------|----------|----------|-------|
| BinaxNOW Ag                   | RT-PCR   |          |       |
|                               | Positive | Negative | Total |
| Positive                      | 10       | 1        | 11    |
| Negative                      | 5        | 35       | 40    |
| Total (29.4% prevalence)      | 15       | 36       | 51    |

## Supplementary Table 4

**Predictive value of the Abbott BinaxNOW for detection of SARS-CoV-2 in samples from adult and pediatric ( $\leq 18$ ) patients, with varying prevalence, based on observed sensitivity/specificity in each subgroup.**

|                         | Prevalence           |                      |                      |                      |
|-------------------------|----------------------|----------------------|----------------------|----------------------|
|                         | 20%                  | 10%                  | 5%                   | 1%                   |
| <b>PPV</b>              |                      |                      |                      |                      |
| Adult, Sx $< 7D$        | 100%                 | 100%                 | 100%                 | 100%                 |
| Adult, ASx              | 97.65% (93.91-99.12) | 94.87% (87.27-98.03) | 89.75% (76.45-95.93) | 62.68% (38.39-81.91) |
| Pediatric, Sx $< 7D$    | 100%                 | 100%                 | 100%                 | 100%                 |
| Pediatric, ASx          | 93.41% (88.32-96.38) | 86.30% (77.06-92.20) | 74.91% (61.41-84.85) | 36.42% (23.40-51.80) |
| <b>NPV</b>              |                      |                      |                      |                      |
| Adult, Sx $\leq 7D$     | 99.17% (98.38-99.58) | 99.63% (99.27-99.81) | 99.82% (99.65-99.91) | 99.97% (99.93-99.98) |
| Adult, ASx              | 93.15% (90.11-95.30) | 96.83% (95.35-97.85) | 98.47% (97.74-98.97) | 99.70% (99.56-99.80) |
| Pediatric, Sx $\leq 7D$ | 96.30% (95.20-97.15) | 98.32% (97.81-98.71) | 99.20% (98.95-99.39) | 99.84% (99.80-99.88) |
| Pediatric, ASx          | 91.89% (89.95-93.49) | 96.23% (95.27-97.00) | 98.18% (97.70-98.55) | 99.64% (99.55-99.72) |

PPV and NPV were calculated using the sensitivity and specificity observed in each subgroup for a hypothetical population of 1000 individuals per subgroup, with varying prevalence. PPV, positive predictive value; NPV, negative predictive value; Sx, symptomatic; ASx, asymptomatic; D, days

## Supplementary Table 5

### Performance of the Abbott BinaxNOW versus RT-PCR with varied Ct value cutoffs

|                           | All Ct Values |             |             |       | Ct values $\leq 35$ |             |             |       | Ct values $\leq 30$ |             |             |        | Ct values $\leq 25$ |             |             |       |
|---------------------------|---------------|-------------|-------------|-------|---------------------|-------------|-------------|-------|---------------------|-------------|-------------|--------|---------------------|-------------|-------------|-------|
|                           | N             | TP<br>(+/+) | FN<br>(+/-) | Sens  | N                   | TP<br>(+/+) | FN<br>(+/-) | Sens  | N                   | TP<br>(+/+) | FN<br>(+/-) | Sens   | N                   | TP<br>(+/+) | FN<br>(+/-) | Sens  |
| Combined All              | 292           | 226         | 66          | 77.4% | 276                 | 224         | 52          | 81.2% | 214                 | 205         | 9           | 95.8%  | 150                 | 149         | 1           | 99.3% |
| All Children (Sx, ASx)    | 135           | 94          | 41          | 69.6% | 125                 | 92          | 33          | 73.6% | 92                  | 83          | 9           | 90.2%  | 62                  | 61          | 1           | 98.4% |
| All Adult (Sx, ASx)       | 157           | 132         | 25          | 84.1% | 151                 | 132         | 19          | 87.4% | 122                 | 122         | 0           | 100.0% | 88                  | 88          | 0           | 100%  |
| Sx ( $\leq 7D$ ) Children | 26            | 22          | 4           | 84.6% | 25                  | 22          | 3           | 88.0% | 21                  | 20          | 1           | 95.2%  | 14                  | 14          | 0           | 100%  |
| Sx ( $\leq 7D$ ) Adult    | 85            | 82          | 3           | 96.5% | 85                  | 82          | 3           | 96.5% | 76                  | 76          | 0           | 100.0% | 59                  | 59          | 0           | 100%  |
| ASx Children              | 107           | 70          | 37          | 65.4% | 98                  | 68          | 30          | 69.4% | 69                  | 61          | 8           | 88.4%  | 48                  | 47          | 1           | 97.9% |
| ASx Adult                 | 57            | 40          | 17          | 70.2% | 51                  | 40          | 11          | 78.4% | 37                  | 37          | 0           | 100.0% | 24                  | 24          | 0           | 100%  |

Ct, cycle threshold; TP, true positive (RT-PCR positive/BinaxNOW positive); FN, false negative (RT-PCR positive/BinaxNOW negative); Sens, sensitivity; Sx, symptomatic; ASx, asymptomatic; D, days; Ped, pediatric

**Supplementary Table 6**

**Impact of temperature on BinaxNOW performance in individuals  $\leq 7$  days post symptom onset**

| BinaxNOW result | RT-PCR result                                |          |       |                                               |          |       |
|-----------------|----------------------------------------------|----------|-------|-----------------------------------------------|----------|-------|
|                 | Temperature range: $\geq 59^{\circ}\text{F}$ |          |       | Temperature range: 46-58.5 $^{\circ}\text{F}$ |          |       |
|                 | Positive                                     | Negative | Total | Positive                                      | Negative | Total |
| Positive        | 104                                          | 0        | 104   | 6                                             | 1        | 7     |
| Negative        | 7                                            | 335      | 342   | 3                                             | 20       | 23    |
| Total           | 111                                          | 335      | 446   | 9                                             | 21       | 30    |
| Sensitivity     | (104/111) 93.7%                              |          |       | (6/9) 66.7%                                   |          |       |
| Specificity     | (335/335) 100.0%                             |          |       | (20/21) 95.2%                                 |          |       |

The manufacturer recommends that tests be run at temperatures  $\geq 59^{\circ}\text{F}$ . Ag, antigen; Sx, symptoms

## Supplementary Figure 1

### Correlation of Cycle Threshold with BinaxNOW band strength

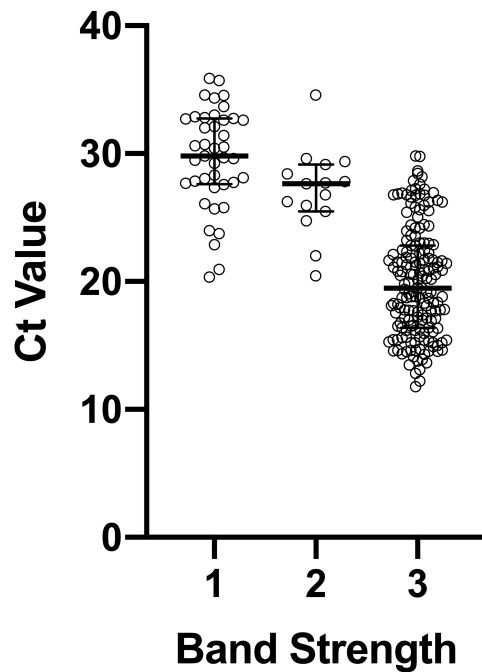

Band strength (1= faint, n = 41; 2 = medium, n = 15; 3 = strong, n = 170) as interpreted by the first reader for the 226 true positive BinaxNOW tests correlated clearly with Ct value, with median Cts of 29.7 (27.6-32.7), 27.7 (25.5-29.1), and 19.5 (16.4-22.8), respectively.
